# Supplementary material
Source: publisher figshare collection journal article supplement (https://frontiersin.figshare.com/ndownloader/files/25506791)
Supplement: Supplementary file [file 25506791]

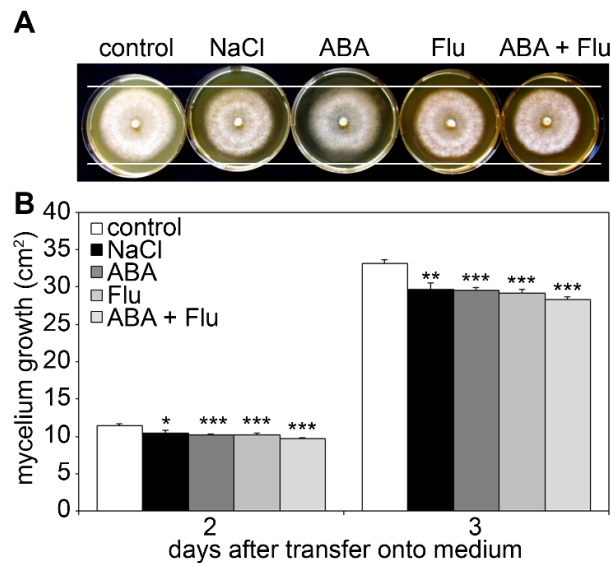

**Supplementary Figure S3. Salt-stress and ABA do not increase *B. cinerea* growth on culture medium.**

(A) Agar pieces of 5 mm diameter containing *B. cinerea* mycelium were transferred onto potato dextrose agar plates supplemented with 150 mM NaCl, 100  $\mu$ M ABA, 100 $\mu$ M Fluridone (Flu), or a combination of ABA and Fluridone. *Botrytis* mycelium growth was monitored on day 3 after transfer to the culture plates, white lines indicate outgrowth of the control culture. (B) Mycelium proliferation was quantified on days 2 and 3 after transfer to the culture plates. Error bars indicate standard deviation (n = 10), significant differences compared to the untreated control are shown by asterisks (\* p < 0.05, \*\* p < 0.01, \*\*\* p < 0.001; Student's *t*-test). The experiment was repeated with similar results.
